# Supplementary material
Source: publisher site journal article supplement (https://www.dovepress.com/article/329204)
Supplement: Supplementary file 1 [file get_supplementary_file.php]

**Appendix 1.** Approaches and Study Skills Inventory for Students (ASSIST) short-form scales, subscales, and items

| **ASSIST short-form** | | |
| --- | --- | --- |
| **Scales** | **Subscales** | **Items** |
| Deep approach | Seeking meaning (item 2)  Interest in ideas (item 6)  Relating ideas (items 10, 15)  Use of evidence (items 12, 17) | When I'm reading an article or book, I try to find out for myself exactly what the author means. (item 2)  Regularly, I find myself thinking about ideas from lectures when I'm doing other things. (item 6)  When I'm working on a new topic, I try to see in my own mind how all the ideas fit together. (item 10)  Ideas in course books or articles often set me off on long chains of thought of my own. (item 15)  Often I find myself questioning things I hear in lectures or read in books. (item 12)  When I read, I examine the details carefully to see how they fit in with what's being said. (item 17) |
| Surface approach | Lack purpose (item 1)  Syllabus bound (item 4)  Unrelated memorization (items 8, 18)  Fear of failure (items 14, 16) | Often I find myself wondering if the work I am doing here is really worthwhile. (item 1)  I concentrate on learning just those bits of information I have to know to pass. (item 4)  Much of what I'm studying makes little sense. It's like unrelated bits and pieces. (item 8)  I often have trouble in making sense of the things I have to remember. (item 18)  Often I feel I'm drowning in the sheer amount of material we have to deal with. (item 14)  I often worry about whether I'll ever be able to cope with the school work properly. (item 16) |
| Strategic approach | Organized studying (item 13)  Alert to assessment (item 5)  Achieving (items 9, 11)  Time management (items 3, 7) | I manage to find conditions for studying which allow me to get on with my work easily. (item 13)  I look carefully at instructor's comments to see how to get higher grades next time. (item 5)  I put a lot of effort into studying because I'm determined to do well. (item 9)  I don’t find it at all difficult to motivate myself. (item 11)  I organize my study time carefully to make the best use of it. (item 3)  I'm pretty good at getting down to schoolwork whenever I need to. (item 7) |

**Notes:** Adapted with permission from Speth CA, Namuth DM, Lee DJ. Using the ASSIST short-form for evaluating an information technology application: Validity and reliability issues. Informing Sci. 2007;10:107-119.18
